# Supplementary material for: The anticancer peptide LL-III alters the physico-chemical properties of a model tumor membrane promoting lipid bilayer permeabilization
Source: Royal Society of Chemistry journal article supplement (doi:10.1039/d2cp03528f), 2022-12-09
Supplement: d2cp03528f1.pdf [file d2cp03528f1.pdf]

## Supplementary Information

### The anticancer peptide LL-III alters the physico-chemical properties of a model tumor membrane promoting lipid bilayer permeabilization

Marco Campanile<sup>1</sup>, Rosario Oliva<sup>1</sup>, Gerardino D'Errico<sup>1</sup>, Pompea Del Vecchio<sup>1</sup>, Luigi Petraccone<sup>1,\*</sup>

<sup>1</sup> Department of Chemical Sciences, University of Naples Federico II, Via Cintia 4, 80126 Naples, Italy

#### Circular Dichroism (CD)

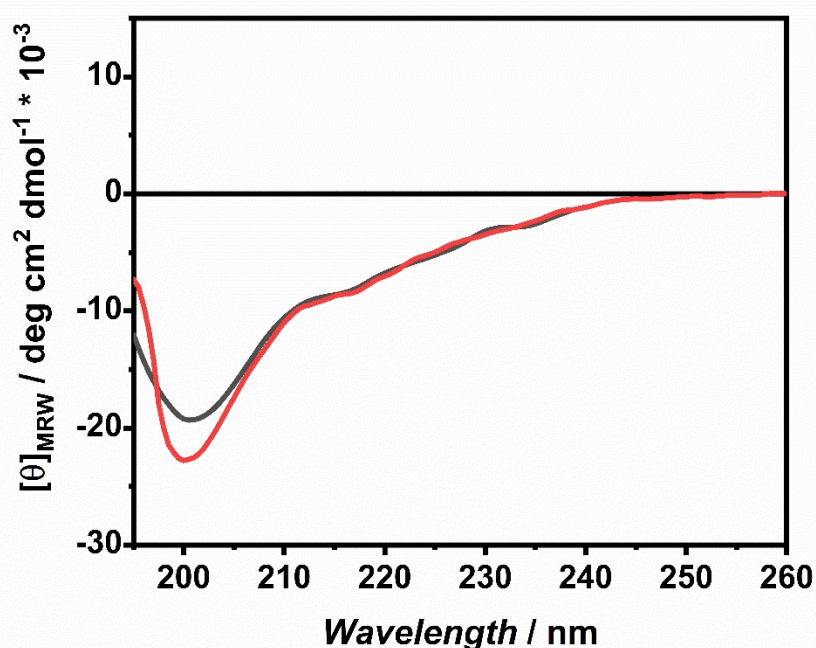

**Figure S1.** CD spectra of 15  $\mu$ M LL-III in 10 mM Sodium Cacodylate pH 6.5 in the absence (black curve) and in the presence (red curve) of 1 mM  $\text{CaCl}_2$  recorded at 25°C.

## Fluorescence spectroscopy and circular dichroism

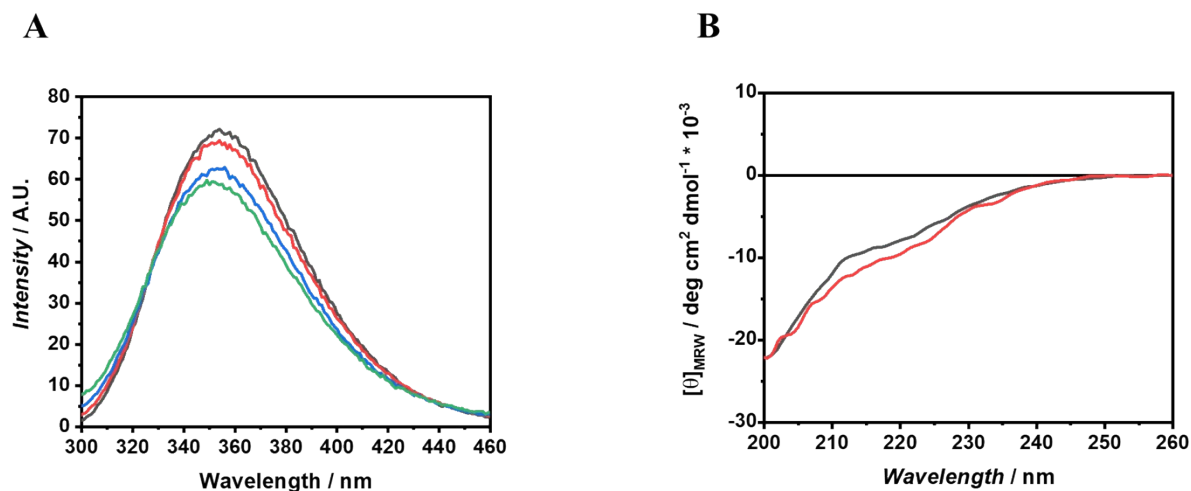

**Figure S2.** Emission spectra of LL-III alone (black curve) and in the presence of 0.2 (red curve), 0.6 (blue curve) and 1 mM (green curve) of POPC:Cholesterol 8:2 LUVs. The experiment was performed in Sodium Cacodylate buffer pH 7.0 + 1 mM  $\text{CaCl}_2$  (A). Far-UV circular dichroism spectra of 15  $\mu\text{M}$  LL-III alone (black curve) and in the presence of POPC/Cholesterol 8:2 LUVs at a lipid/peptide mole ratio of 100 (red curve). All the spectra were recorded at 25°C in 10 mM sodium cacodylate buffer pH 6.5 in the presence of 1 mM  $\text{CaCl}_2$  (B).

## Electron Paramagnetic Resonance (EPR)

**Table S1.** Acyl chain order parameter (S) and isotropic nitrogen hyperfine coupling constant ( $a'_N$ ) for POPC/POPS in 10 mM sodium cacodylate pH 6.5

| <i>n</i> PC-SL | S     | $a'_N$ |
|----------------|-------|--------|
| 5              | 0.631 | 15.15  |
| 7              | 0.590 | 15.14  |
| 10             | 0.489 | 14.64  |
| 14             | 0.208 | 13.80  |

Note: errors on S are  $\pm 0.004$ , errors on  $a'_N$  are  $\pm 0.04$ .

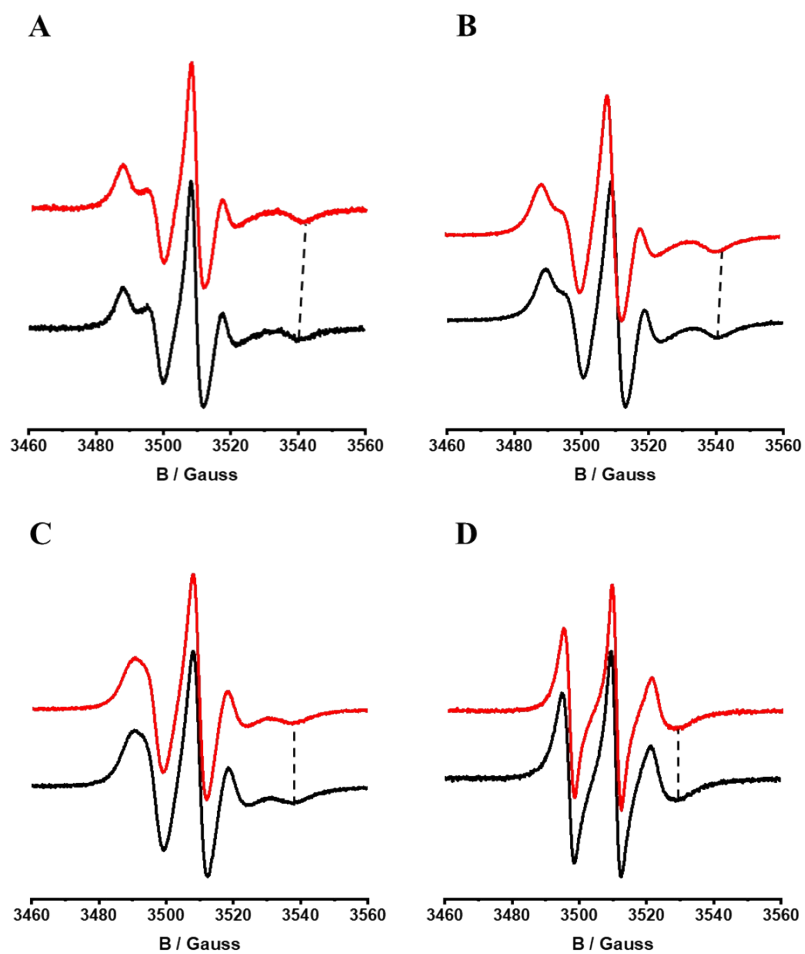

**Figure S3.** EPR spectra of 5PC-SL (A), 7PC-SL (B), 10PC-SL (C), 14PC-SL (D) of POPC/POPS alone (black curve) and in the presence of LL-III at a L/P ratio of 10 (red curve) in 10 mM sodium cacodylate pH 6.5. Dashed lines have been inserted as a guide to the eye to highlight the change of spectral features.

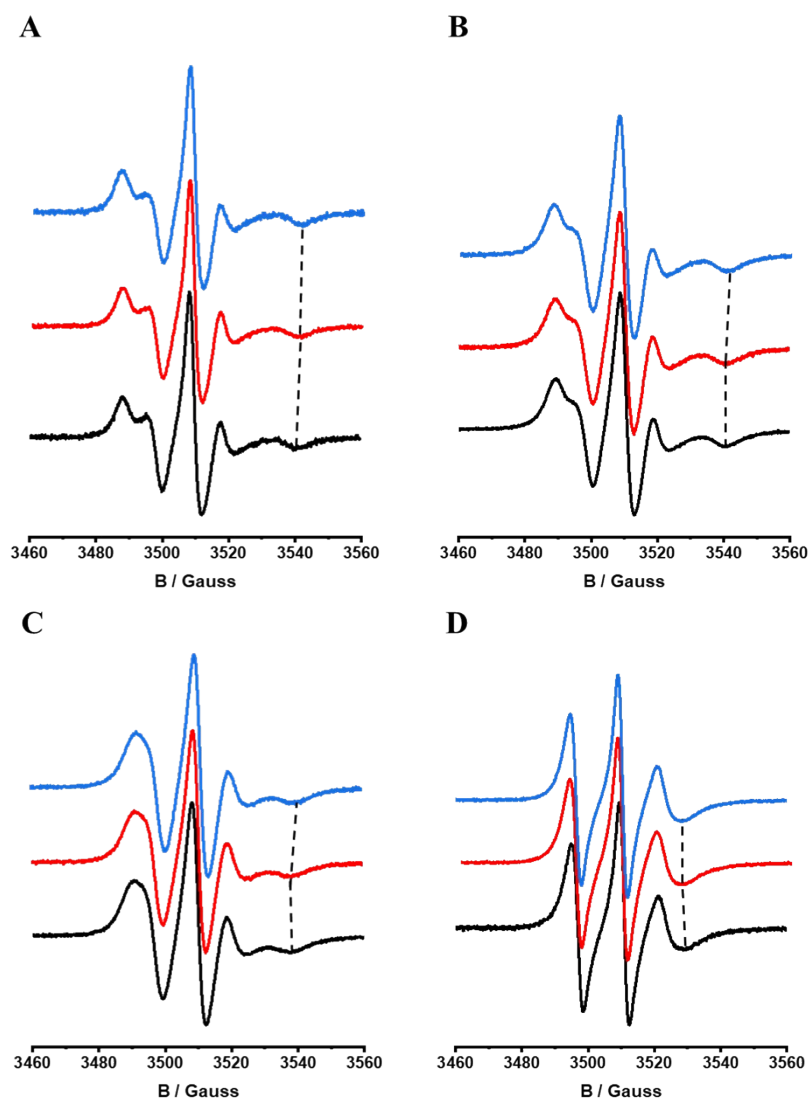

**Figure S4.** EPR spectra of 5PC-SL (A), 7PC-SL (B), 10PC-SL (C), 14PC-SL (D) of POPC/POPS alone (black curve), in the presence of 1 mM CaCl<sub>2</sub> (red curve) and in the presence of both 1 mM CaCl<sub>2</sub> and LL-III at a L/P ratio of 10 (blue curve) in 10 mM sodium cacodylate pH 6.5. Dashed lines have been inserted as a guide to the eye to highlight the change of spectral features.
